# Supplementary material for: COX Inhibitory and Cytotoxic Naphthoketal-Bearing Polyketides from Sparticola junci
Source: MDPI journal article supplement (doi:10.3390/ijms222212379), 2021-11-17
Supplement: s1 [file s1]

## SUPPLEMENTARY INFORMATION

# COX Inhibitory and Cytotoxic Naphthoketal-Bearing Polyketides from *Sparticola junci*

Katherine Yasmin M. Garcia<sup>1,2</sup>, Mark Tristan J. Quimque<sup>1,2,3</sup>, Gian Primahana<sup>4,5,6</sup>,  
Andreas Ratzenböck<sup>7</sup>, Mark Joseph B. Cano<sup>1,2</sup>, Jeremiah Francis A. Llaguno<sup>2</sup>,  
Hans-Martin Dahse<sup>8</sup>, Chayanard Phukhamsakda<sup>9,10</sup>, Frank Surup<sup>4,5</sup>, Marc Stadler<sup>4,5</sup>  
and Allan Patrick G. Macabeo<sup>2,\*</sup>

<sup>1</sup> The Graduate School, University of Santo Tomas, España Blvd., Manila 1015, Philippines; katherineyasmin.garcia.gs@ust.edu.ph (K.Y.M.G.); marktristan.quimque@g.msuii.edu.ph (M.T.J.Q.); markjoseph.cano.gs@ust.edu.ph (M.J.B.C.)

<sup>2</sup> Laboratory for Organic Reactivity, Discovery and Synthesis (LORDS), Research Center for the Natural and Applied Sciences, University of Santo Tomas, España Blvd., Manila 1015, Philippines; jeremiahfrancis.llaguno.sci@ust.edu.ph

<sup>3</sup> Chemistry Department, College of Science and Mathematics, Mindanao State University Iligan Institute of Technology, Tibanga, Iligan City 9200, Philippines

<sup>4</sup> Department of Microbial Drugs, Helmholtz Centre for Infection Research and German Centre for Infection Research (DZIF), Partner Site Hannover/Braunschweig, Inhoffenstrasse 7, 38124 Braunschweig, Germany; gian.primahana@helmholtz-hzi.de (G.P.); frank.surup@helmholtz-hzi.de (F.S.); marc.stadler@helmholtz-hzi.de (M.S.)

<sup>5</sup> Institute of Microbiology, Technische Universität Braunschweig, Spielmannstraße 7, 38106 Braunschweig, Germany

<sup>6</sup> Research Center for Chemistry, National Research and Innovation Agency (BRIN), Kawasan Puspitek, Serpong, Tangerang Selatan 15314, Indonesia

<sup>7</sup> Institut für Organische Chemie, Universität Regensburg, Universitätstrasse 31, 93053 Regensburg, Germany; andreas.ratzenboeck@chemie.uni-regensburg.de

<sup>8</sup> Leibniz-Institute for Natural Product Research and Infection Biology, Hans-Knöll-Institute (HKI), 07745 Jena, Germany; hans-martin.dahse@hki-jena.de

<sup>9</sup> Center of Excellence in Fungal Research, Mae Fah Luang University, Chiang Rai 57100, Thailand; chayanard91@gmail.com

<sup>10</sup> Institute of Plant Protection, College of Agriculture, Engineering Research Center of Chinese Ministry of Education for Edible and Medicinal Fungi, Jilin Agricultural University, Changchun 130118, China

\*Correspondence: agmacabeo@ust.edu.ph

## LIST OF SUPPORTING INFORMATION

|                                                                                                                                 | Page |
|---------------------------------------------------------------------------------------------------------------------------------|------|
| <b>Figure S1.</b> $^1\text{H}$ NMR spectrum (MeOH- $d_4$ , 600 MHz) of sparticatechol A ( <b>1</b> )                            | 3    |
| <b>Figure S2.</b> $^{13}\text{C}$ NMR spectrum (MeOH- $d_4$ , 600 MHz) of sparticatechol A ( <b>1</b> )                         | 3    |
| <b>Figure S3.</b> HSQC-DEPT spectrum of sparticatechol A ( <b>1</b> )                                                           | 4    |
| <b>Figure S4.</b> COSY spectrum of sparticatechol A ( <b>1</b> )                                                                | 4    |
| <b>Figure S5.</b> HMBC spectrum of sparticatechol A ( <b>1</b> )                                                                | 5    |
| <b>Figure S6.</b> ROESY spectrum of sparticatechol A ( <b>1</b> )                                                               | 5    |
| <b>Figure S7.</b> HR-ESIMS spectrum of sparticatechol A ( <b>1</b> )                                                            | 6    |
| <b>Figure S8.</b> $^1\text{H}$ NMR spectrum (MeOH- $d_4$ , 500 MHz) of sparticolin H ( <b>2</b> )                               | 7    |
| <b>Figure S9.</b> $^{13}\text{C}$ NMR spectrum (MeOH- $d_4$ , 125 MHz) of sparticolin H ( <b>2</b> )                            | 7    |
| <b>Figure S10.</b> HSQC-DEPT spectrum of sparticolin H ( <b>2</b> )                                                             | 8    |
| <b>Figure S11.</b> COSY spectrum of sparticolin H ( <b>2</b> )                                                                  | 8    |
| <b>Figure S12.</b> HMBC spectrum of sparticolin H ( <b>2</b> )                                                                  | 9    |
| <b>Figure S13.</b> NOESY spectrum of sparticolin H ( <b>2</b> )                                                                 | 9    |
| <b>Figure S14.</b> HR-ESIMS spectrum of sparticolin H ( <b>2</b> )                                                              | 10   |
| <b>Figure S15.</b> Low energy conformers (> 1%) of (8 <i>S</i> ,22 <i>R</i> )- <b>1</b> optimized at B3LYP/6-31G(d) (PCM/MeOH). | 11   |
| <b>Table S1.</b> Lipinski's rule of five for ADME analysis of compounds <b>1-3</b>                                              | 12   |
| <b>Table S2.</b> Predicted toxicity parameters of compounds <b>1-3</b>                                                          | 12   |

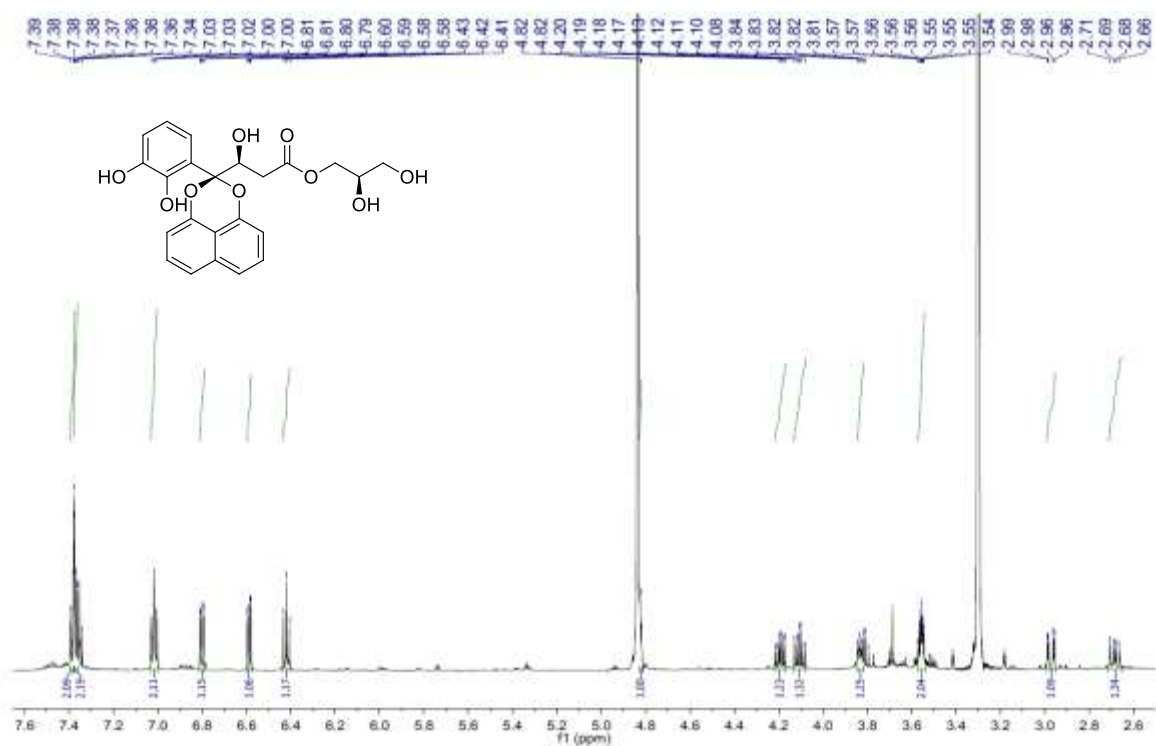

**Figure S1.** <sup>1</sup>H NMR spectrum (MeOH-*d*<sub>4</sub>, 600 MHz) of sparticatechol A (1)

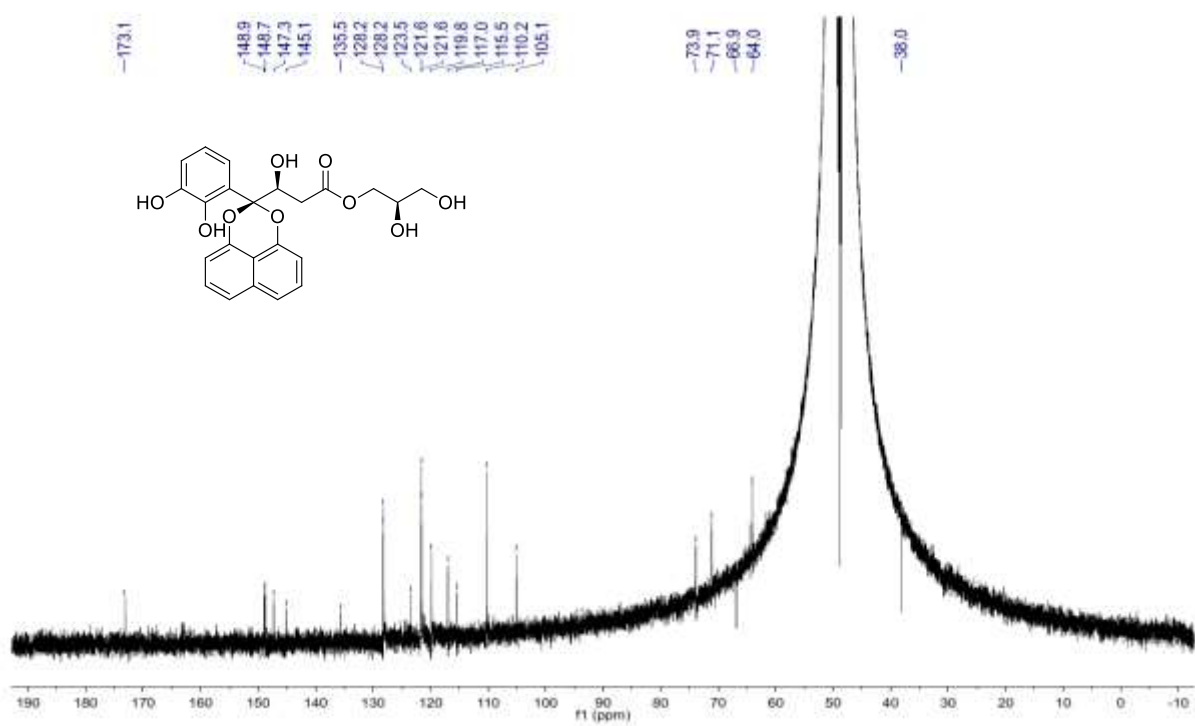

**Figure S2.** <sup>13</sup>C NMR spectrum (MeOH-*d*<sub>4</sub>, 600 MHz) of sparticatechol A (1)

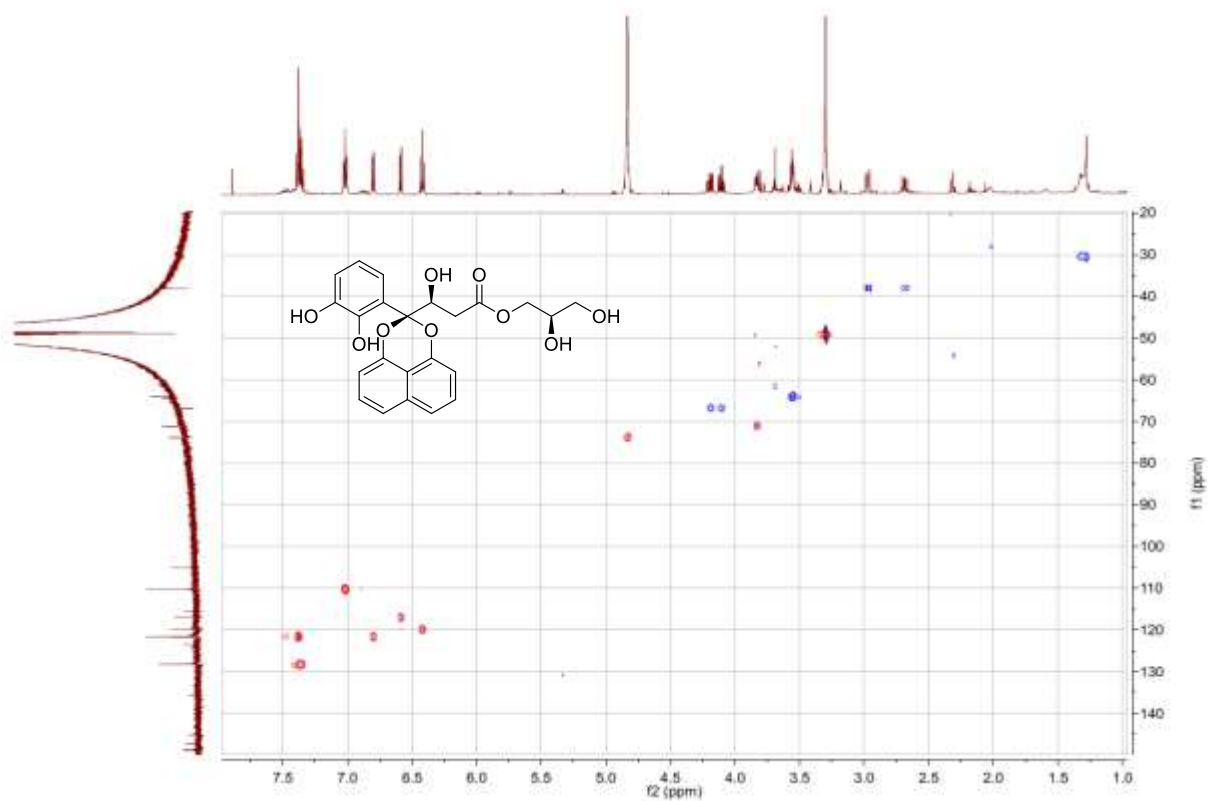

**Figure S3.** HSQC-DEPT spectrum of sparticatechol A (1)

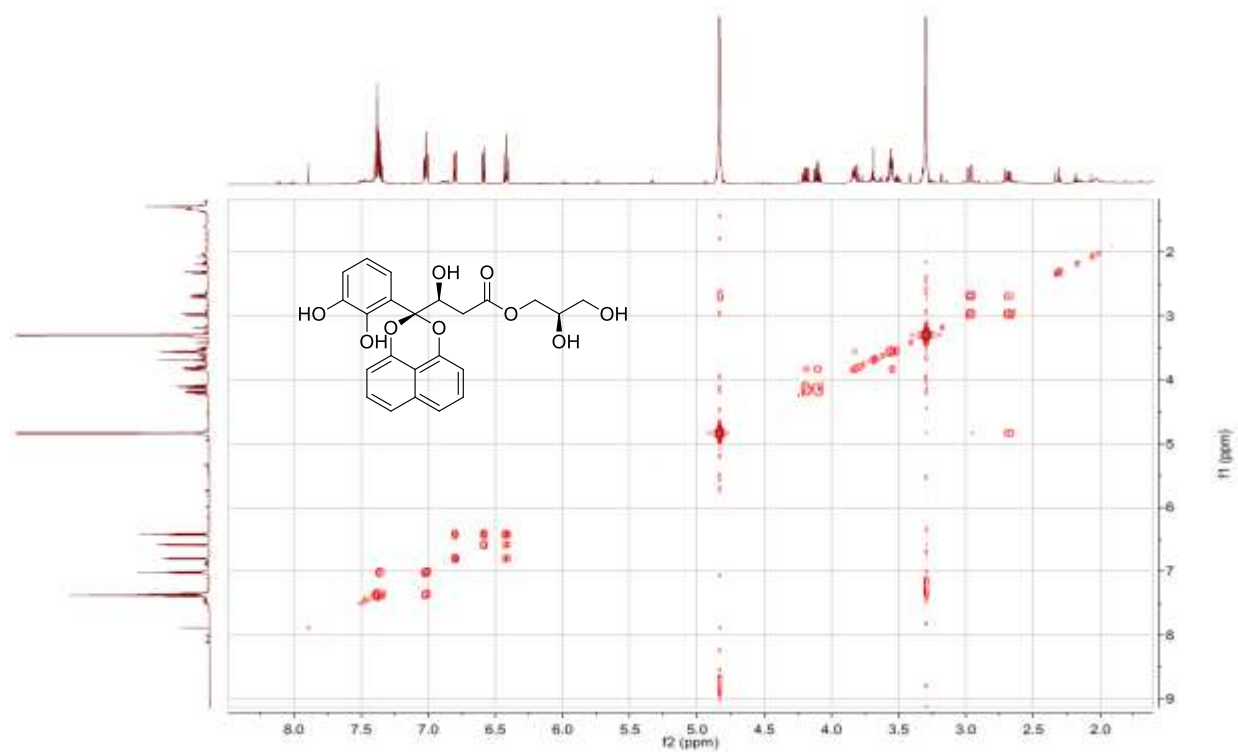

**Figure S4.** COSY spectrum of sparticatechol A (1)

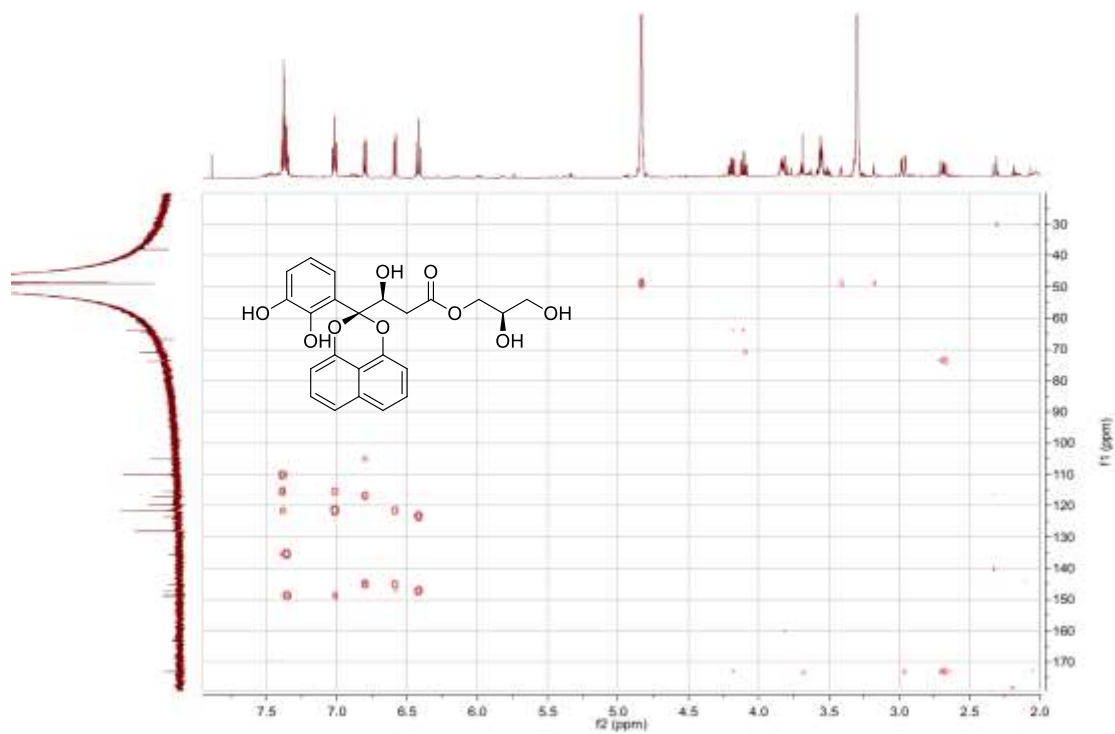

**Figure S5.** HMBC spectrum of sparticatechol A (**1**)

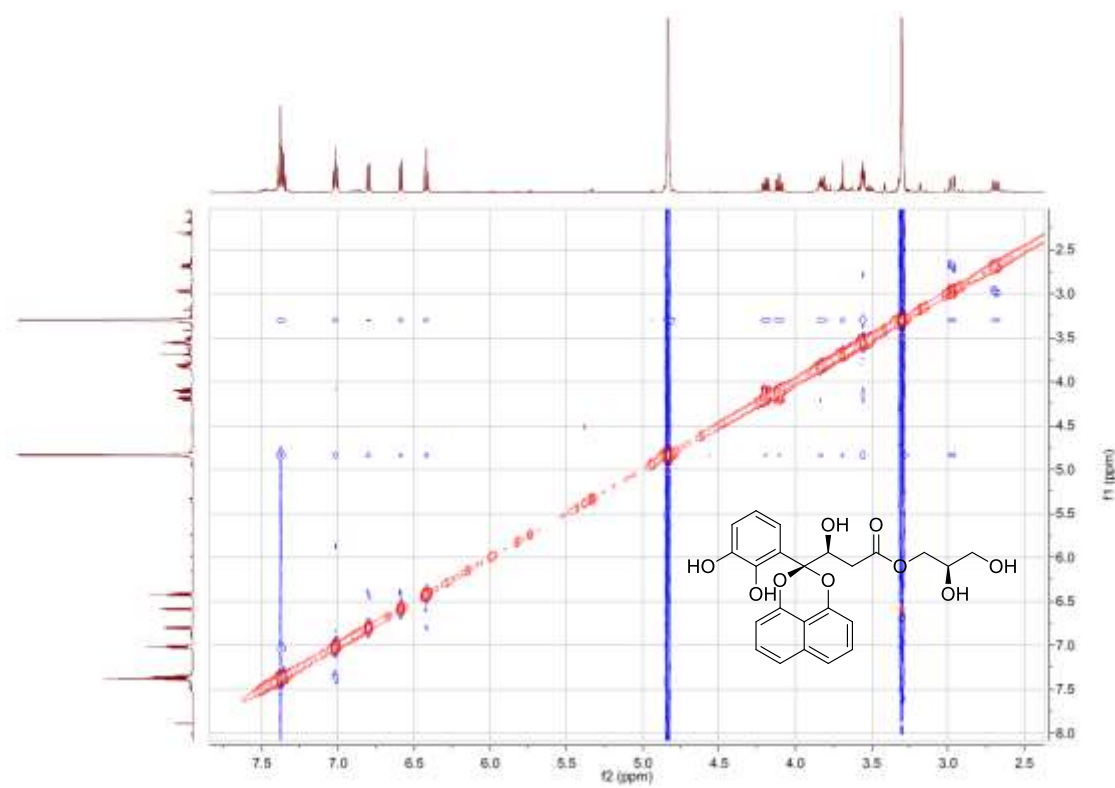

**Figure S6.** ROESY spectrum of sparticatechol A (**1**)

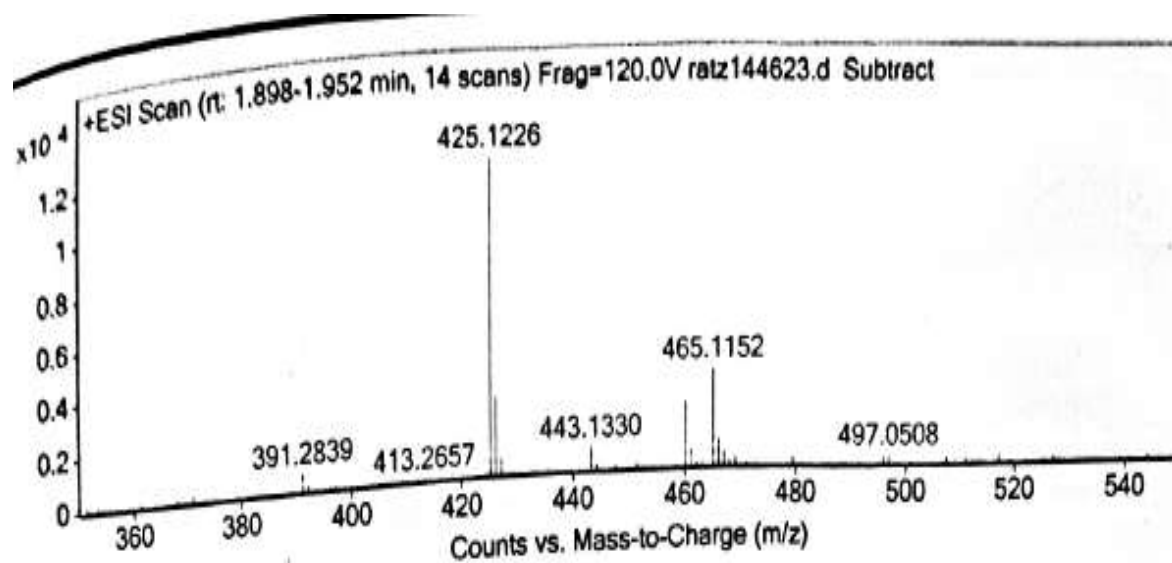

Figure S7. HR-ESIMS spectrum of sparticatechol A (1)

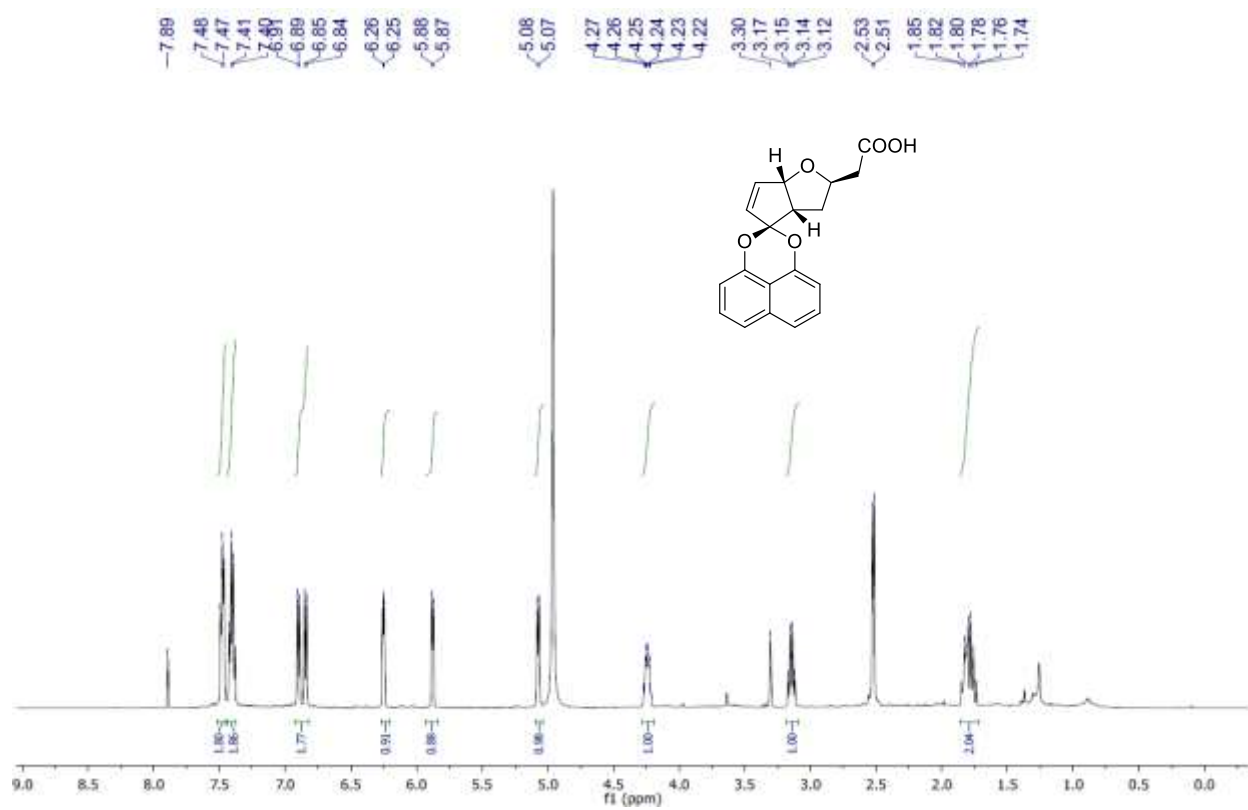

**Figure S8.** <sup>1</sup>H NMR spectrum (MeOH-*d*<sub>4</sub>, 500 MHz) of sparticolin H (2)

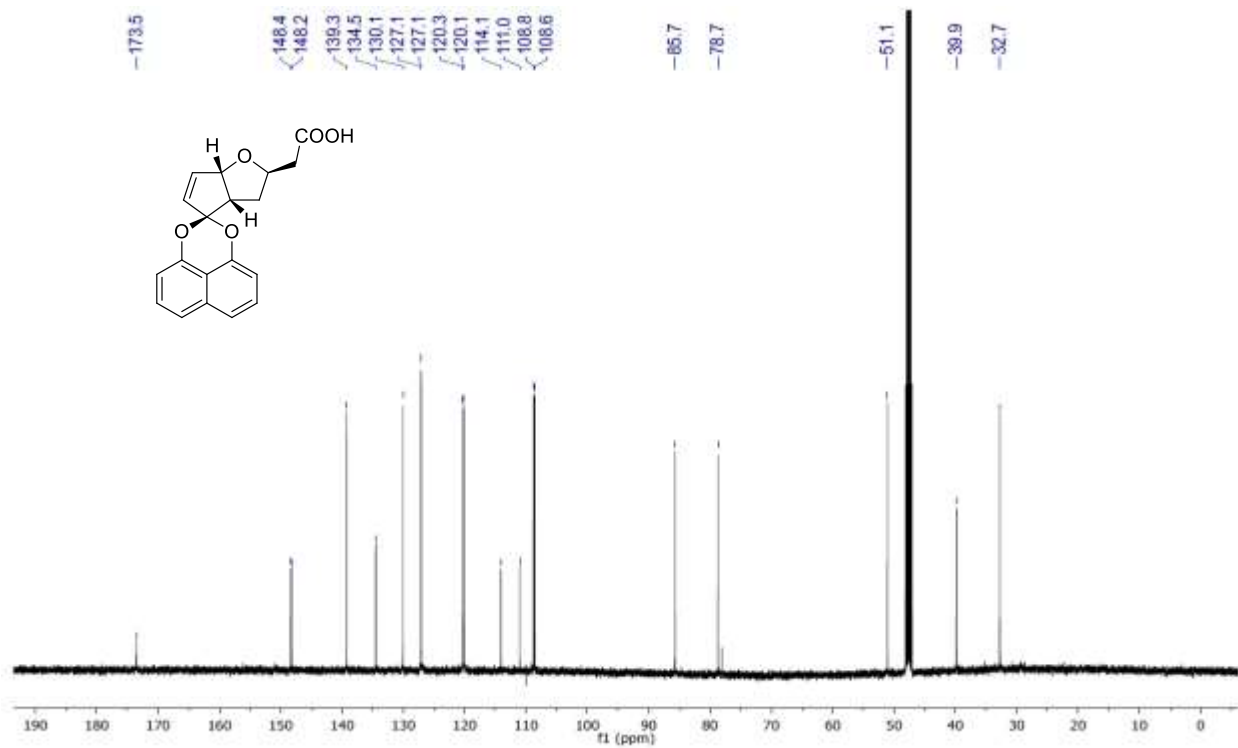

**Figure S9.** <sup>13</sup>C NMR spectrum (MeOH-*d*<sub>4</sub>, 125 MHz) of sparticolin H (2)

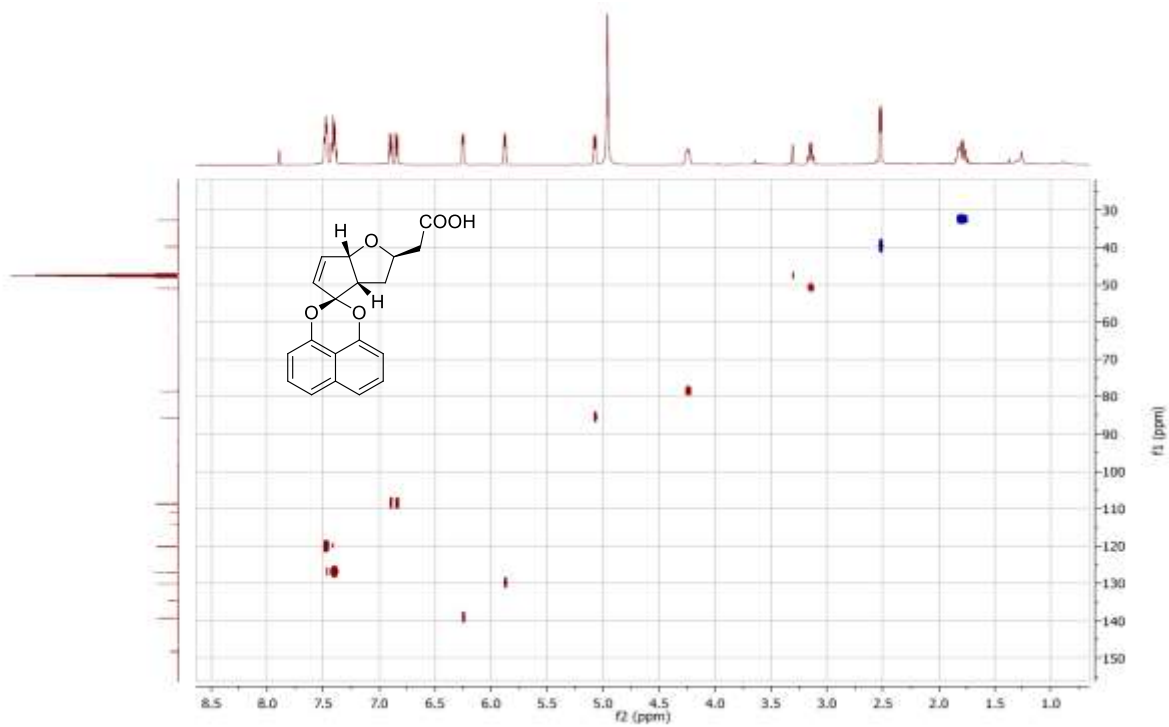

**Figure S10.** HSQC spectrum of sparticolin H (2)

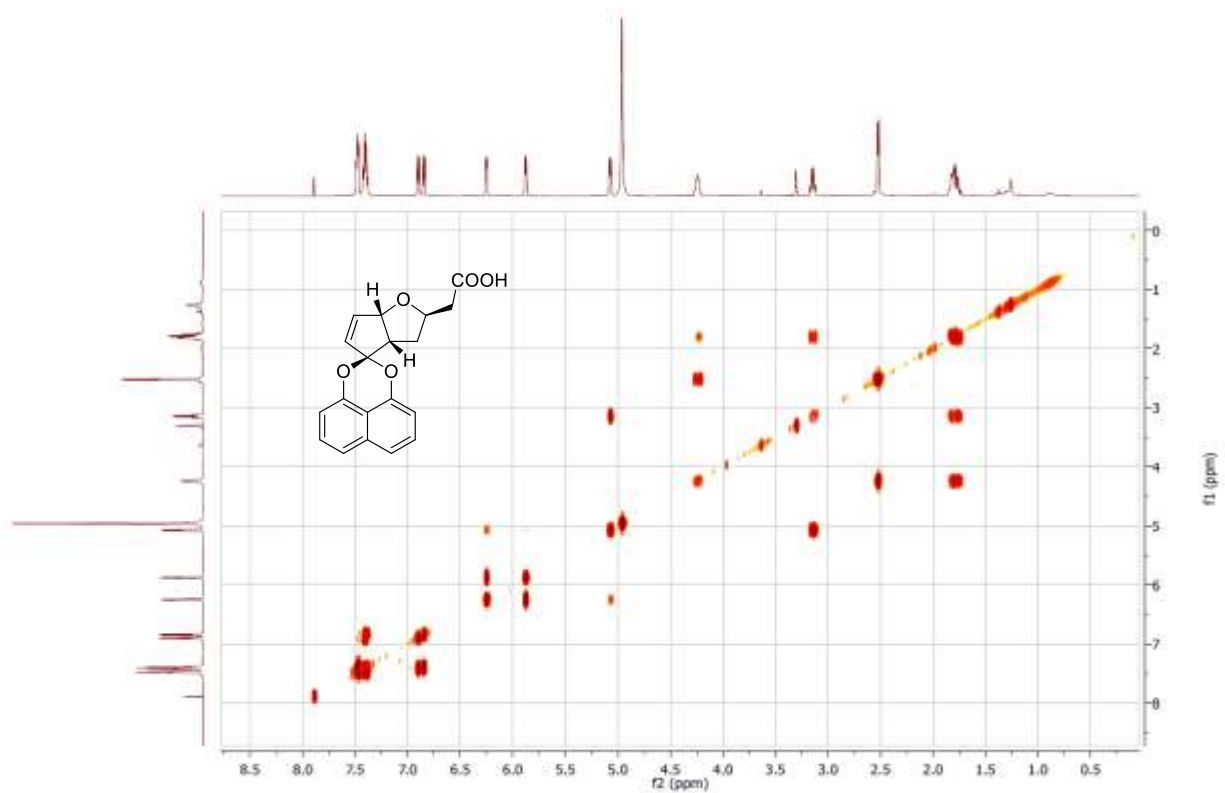

**Figure S11.** COSY spectrum of sparticolin H (2)



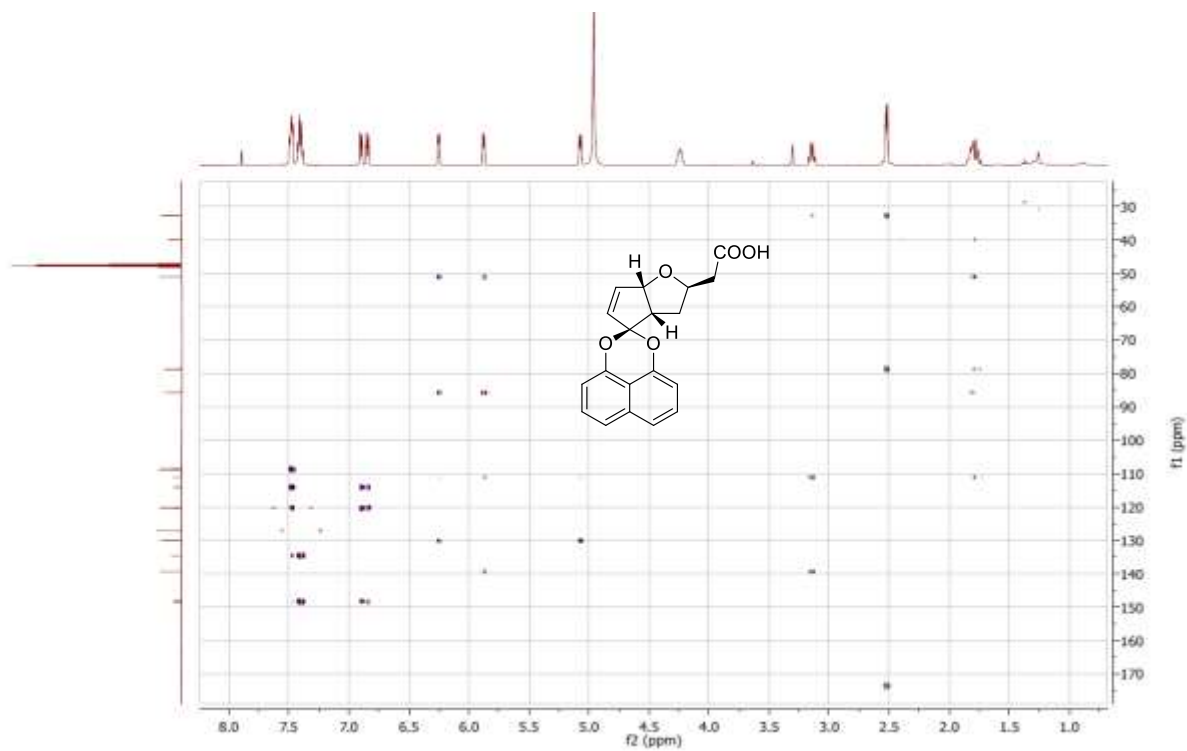

**Figure S12.** HMBC spectrum of sparticolin H (2)

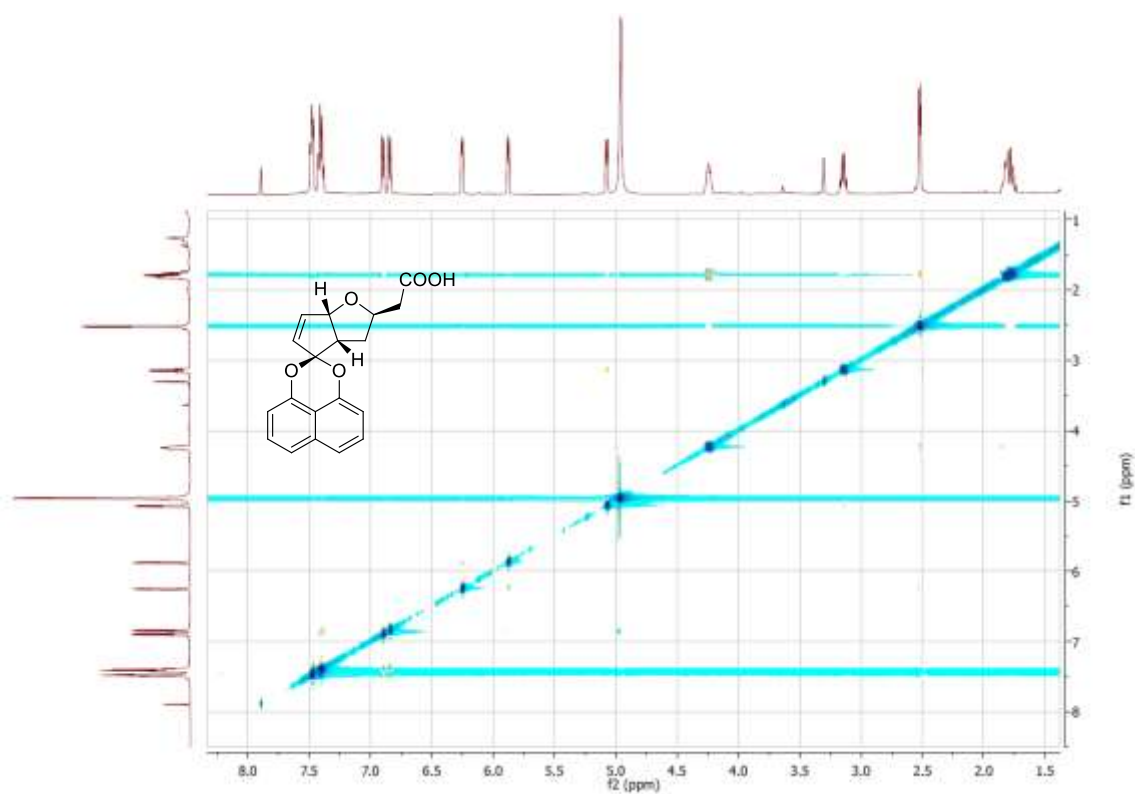

**Figure S13.** NOESY spectrum of sparticolin H (2)

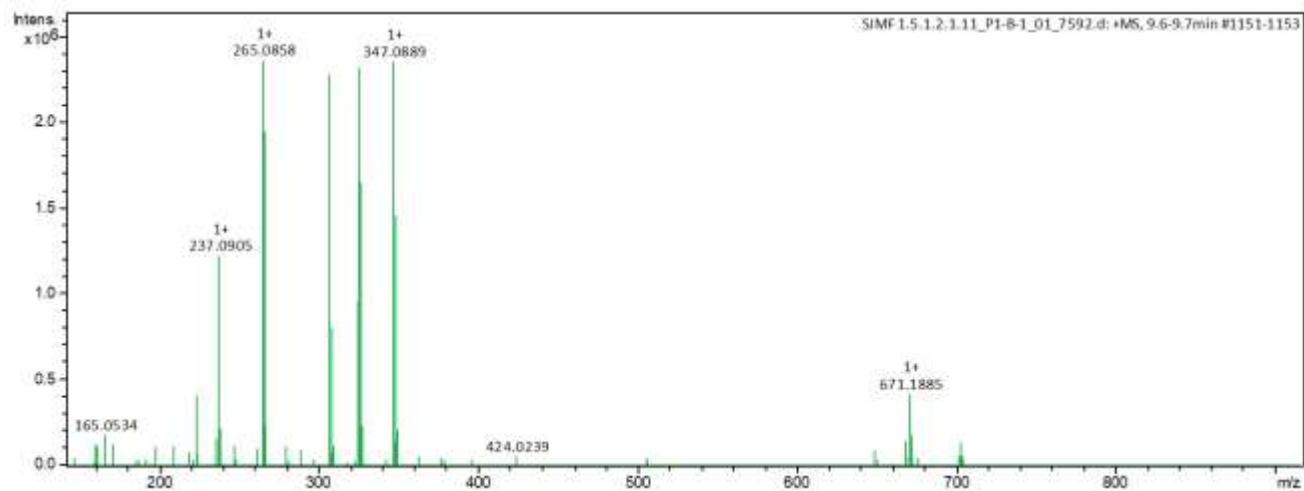

**Figure S14.** HR-ESIMS spectrum of sparticolin H (2)

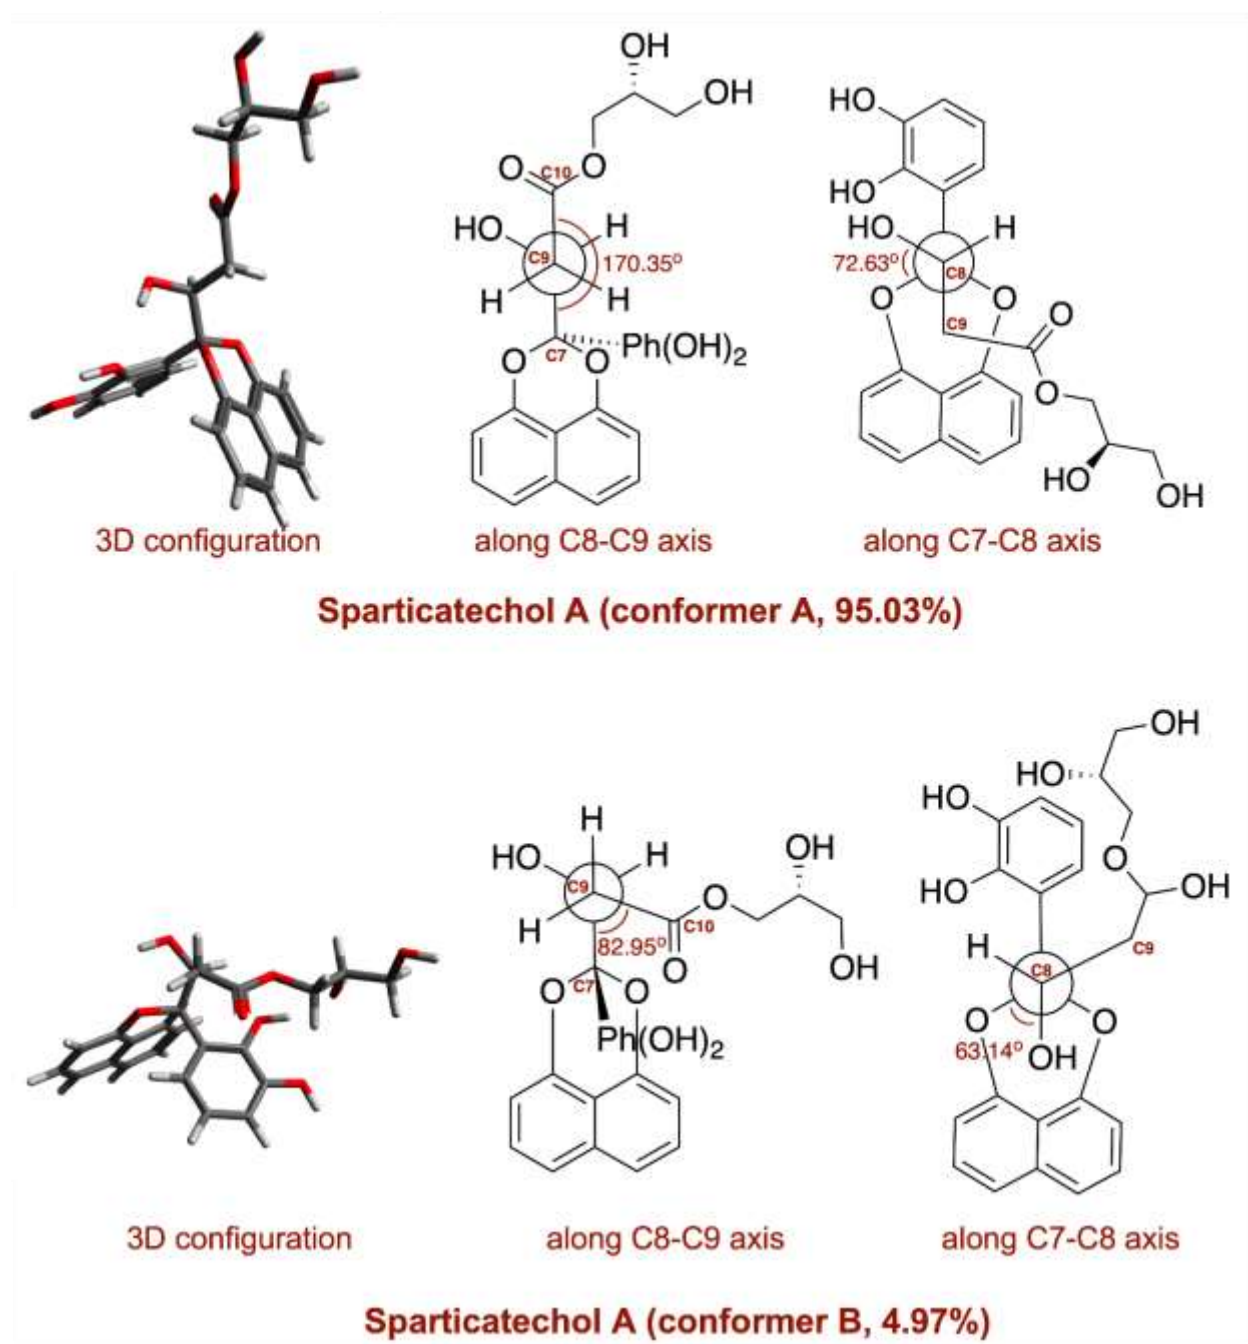

**Figure S15.** Low energy conformers (> 1%) of (8*S*,22*R*)-**1** optimized at B3LYP/6-31G(d) (PCM/MeOH).

**Table S1.** Lipinski's rule of five for ADME analysis of compounds **1-3**.

| Compound | Lipinski's Rule of Five  |                       |              |                 |                 | Drug-likeness |
|----------|--------------------------|-----------------------|--------------|-----------------|-----------------|---------------|
|          | Molecular weight (g/mol) | Lipophilicity (MLogP) | H-bond donor | H-bond acceptor | Rule violations |               |
|          | < 500                    | < 5                   | ≤ 5          | ≤ 10            | <2              |               |
| <b>1</b> | 442.42                   | 0.67                  | 5            | 9               | 0               | yes           |
| <b>2</b> | 324.33                   | 2.31                  | 1            | 5               | 0               | yes           |
| <b>3</b> | 322.31                   | 2.16                  | 2            | 5               | 0               | yes           |

**Table S2.** Predicted toxicity parameters of compounds **1-3**.

| Compound | Mutagenicity | Tumorigenicity | Irritant Effect | Reproductive Toxicity |
|----------|--------------|----------------|-----------------|-----------------------|
| <b>1</b> | High Risk    | None           | None            | None                  |
| <b>2</b> | High Risk    | None           | None            | None                  |
| <b>3</b> | High Risk    | None           | None            | None                  |
